# Supplementary material for: Comparison of miRNA expression profiles in pituitary–adrenal axis between Beagle and Chinese Field dogs after chronic stress exposure
Source: PeerJ. 2016 Feb 18;4:e1682. doi: 10.7717/peerj.1682 (PMC4768678; doi:10.7717/peerj.1682)
Supplement: Table S1 [file peerj-04-1682-s004.xlsx]

## Sheet: Sheet1
171 differentially expressed genes identified in adrenal cortex					511 differentially expressed genes identified in pituitary
gene_id	gene_short_name	description	locus		gene_id	gene_short_name	description	locus
ENSCAFG00000002801	NPY	neuropeptide Y	14:37824560-37831424		ENSCAFG00000000217	SGK	Uncharacterized protein	1:27085979-27196521
ENSCAFG00000003016	ALB	Canis lupus familiaris albumin (ALB) mRNA.	13:62152697-62169575		ENSCAFG00000002174	GADD45G	growth arrest and DNA-damage-inducible gamma	1:96744757-96746752
ENSCAFG00000003685	CREM	Canis lupus familiaris cAMP responsive element modulator (CREM) mRNA.	2:1751311-1828948		ENSCAFG00000004020	SYNGR4	synaptogyrin 4	1:107872145-107878542
ENSCAFG00000005186	MRPL33	mitochondrial ribosomal protein L33	18:53319765-53364663		ENSCAFG00000006347	NEUROD4	neuronal differentiation 4	27:389094-390090
ENSCAFG00000005246	CCK	Cholecystokinins Cholecystokinin-58 Cholecystokinin-58 desnonopeptide Cholecystokinin-39 Cholecystokinin-33 Cholecystokinin-25 Cholecystokinin-18 Cholecystokinin-12 Cholecystokinin-8 Cholecystokinin-7 Cholecystokinin-5	23:11414524-11418792		ENSCAFG00000007338	NR4A1	nuclear receptor subfamily 4 group A member 1	27:2947618-2955829
ENSCAFG00000005365	DGAT2	diacylglycerol O-acyltransferase 2	21:22831182-23021253		ENSCAFG00000010596	SIK1	salt-inducible kinase 1	31:37455074-37465807
ENSCAFG00000007950	MAP1B	microtubule-associated protein 1B	2:55174105-55258400		ENSCAFG00000011675	C3orf84	chromosome 3 open reading frame 84	20:40012853-40021975
ENSCAFG00000008062	-	Uncharacterized protein	8:8320212-8323009		ENSCAFG00000012377	SLCO1C1	solute carrier organic anion transporter family member 1C1	27:26497583-26549041
ENSCAFG00000008386	STMN2	stathmin-like 2	29:27055751-27105745		ENSCAFG00000012757	SEC14L3	SEC14-like 3 (S. cerevisiae)	26:23581201-23583492
ENSCAFG00000008424	FGB	Fibrinogen beta chain Fibrinopeptide B Fibrinogen beta chain	15:52220661-52229692		ENSCAFG00000013288	ADAMTSL3	ADAMTS-like 3	3:55358796-55695236
ENSCAFG00000008582	VCAN	versican	3:24127133-24239146		ENSCAFG00000015753	SFTPD	surfactant protein D	4:29394767-29407293
ENSCAFG00000008623	PRPH	peripherin	27:5314757-5318479		ENSCAFG00000017765	GRIA1	glutamate receptor ionotropic AMPA 1	4:55803946-56103537
ENSCAFG00000008988	-	Uncharacterized protein	32:6592627-6745176		ENSCAFG00000018046	TTR	transthyretin	7:57940278-57947136
ENSCAFG00000009337	TUBB2B	tubulin beta 2B class IIb	35:3448031-3498483		ENSCAFG00000018089	DSC3	desmocollin 3	7:58421553-58457593
ENSCAFG00000010072	-	_	24:46668622-47275963		ENSCAFG00000018451	RASD1	RAS dexamethasone-induced 1	5:41965163-41966154
ENSCAFG00000010461	TM4SF20	transmembrane 4 L six family member 20	25:40115075-40300892		ENSCAFG00000020359	AGRP	agouti related protein homolog (mouse)	5:81925054-81925842
ENSCAFG00000010596	SIK1	salt-inducible kinase 1	31:37455074-37465807		ENSCAFG00000020591	cfa-mir-7-1	cfa-mir-7-1	1:75500484-75512921
ENSCAFG00000010772	GAL	Galanin peptides Galanin Galanin message-associated peptide	18:49240310-49246359		ENSCAFG00000021083	U4	U4 spliceosomal RNA	9:4753165-4801491
ENSCAFG00000012065	PEPCK	Canis lupus familiaris phosphoenolpyruvate carboxykinase 1 (soluble) (PCK1) mRNA.	24:42538681-42545260		ENSCAFG00000021151	SNORA63	Small nucleolar RNA SNORA63	34:19354868-19374876
ENSCAFG00000012578	HRH3	Uncharacterized protein	24:45794448-46537627		ENSCAFG00000021647	SNORD15	Small nucleolar RNA SNORD15	21:23181390-23187111
ENSCAFG00000012709	GATA5	GATA binding protein 5	24:45794448-46537627		ENSCAFG00000022317	U2	U2 spliceosomal RNA	9:36905896-37146678
ENSCAFG00000013322	APOC3	Canis lupus familiaris apolipoprotein C-III (APOC3) mRNA.	5:16740338-16908278		ENSCAFG00000022368	SNORA62	Small nucleolar RNA SNORA62/SNORA6 family	23:9070952-9077058
ENSCAFG00000013434	FAM43A	family with sequence similarity 43 member A	33:31067901-31073640		ENSCAFG00000023226	CCL16	chemokine (C-C motif) ligand 16	9:37787620-37792222
ENSCAFG00000013568	AHSG	alpha-2-HS-glycoprotein	34:19221059-19228480		ENSCAFG00000023317	DUSP2	dual specificity phosphatase 2	17:34586715-34589136
ENSCAFG00000014598	HMX1	H6 family homeobox 1	3:60503148-60506799		ENSCAFG00000023840	SLITRK1	SLIT and NTRK-like family member 1	22:36326750-36328841
ENSCAFG00000015878	UCHL1	ubiquitin carboxyl-terminal esterase L1 (ubiquitin thiolesterase)	3:71395591-71410971		ENSCAFG00000025725	-	_	14:6502677-6552742
ENSCAFG00000016091	SNCG	synuclein gamma (breast cancer-specific protein 1)	4:34605354-34609019		ENSCAFG00000025805	SNORA7	Small nucleolar RNA SNORA7	20:5727168-5756140
ENSCAFG00000016934	NGFR	nerve growth factor receptor	9:25601479-25621942		ENSCAFG00000025953	SNORA67	Small nucleolar RNA SNORA67	5:32473595-32594414
ENSCAFG00000018046	TTR	transthyretin	7:57940278-57947136		ENSCAFG00000026126	U12	U12 minor spliceosomal RNA	15:17808444-17818681
ENSCAFG00000018828	CIDEA	cell death-inducing DFFA-like effector a	7:77684989-77704102		ENSCAFG00000026531	-	_	10:46325243-46438559
ENSCAFG00000019423	FAM213B	family with sequence similarity 213 member B	5:57429898-57434387		ENSCAFG00000026767	-	_	10:20786069-20821722
ENSCAFG00000019807	-	Uncharacterized protein	5:63682082-63690798		ENSCAFG00000026919	U6	U6 spliceosomal RNA	32:6758331-6827569
ENSCAFG00000020091	SLC25A25	solute carrier family 25 (mitochondrial carrier; phosphate carrier) member 25	9:55358214-55394519		ENSCAFG00000027465	SNORA76	Small nucleolar RNA SNORA76	27:36786980-36796231
ENSCAFG00000021151	SNORA63	Small nucleolar RNA SNORA63	34:19354868-19374876		ENSCAFG00000027581	SNORA81	Small nucleolar RNA SNORA81	34:19354868-19374876
ENSCAFG00000021301	U2	U2 spliceosomal RNA	15:37110663-37110854		ENSCAFG00000027874	snoU109	Small nucleolar RNA U109	X:105394412-105415532
ENSCAFG00000021573	SNORA55	Small nucleolar RNA SNORA55	15:3242532-3305464		ENSCAFG00000028010	7SK	7SK RNA	19:38519926-38568223
ENSCAFG00000021640	SNORD16	Small nucleolar RNA SNORD16	30:30766980-30770327		ENSCAFG00000028262	SNORD97	Small nucleolar RNA SNORD97	21:33968668-33977654
ENSCAFG00000022040	SNORA31	Small nucleolar RNA SNORA31	22:5710573-5714899		ENSCAFG00000028483	-	_	9:12301008-12307315
ENSCAFG00000022076	SNORD15	Small nucleolar RNA SNORD15	21:23181390-23187111		ENSCAFG00000029214	NPB	neuropeptide B	9:308180-532515
ENSCAFG00000023178	FGA	fibrinogen alpha chain	15:52234318-52246920		ENSCAFG00000031938	GEM	GTP binding protein overexpressed in skeletal muscle	29:39024466-39036781
ENSCAFG00000025410	-	Uncharacterized protein	29:28652306-28656180		ENSCAFG00000000016	MBP	myelin basic protein	1:2859534-2952664
ENSCAFG00000025805	SNORA7	Small nucleolar RNA SNORA7	20:5727168-5756140		ENSCAFG00000000031	NETO1	neuropilin (NRP) and tolloid (TLL)-like 1	1:6114119-6225821
ENSCAFG00000025814	snoU83B	Small nucleolar RNA U83B	10:25740006-25745431		ENSCAFG00000000101	-	Uncharacterized protein	1:17074800-17143744
ENSCAFG00000025978	SNORA64	Small nucleolar RNA SNORA64/SNORA10 family	6:38966853-38968703		ENSCAFG00000000238	KIF5A	Uncharacterized protein	10:1637145-1669273
ENSCAFG00000026039	SNORA58	Small nucleolar RNA SNORA58	7:42974091-43010848		ENSCAFG00000000246	COL23A1	collagen type XXIII alpha 1	11:2997167-3320226
ENSCAFG00000026176	snoU6-53	Small nucleolar RNA U6-53/MBII-28	15:18431018-18471552		ENSCAFG00000000338	GRM1	glutamate receptor metabotropic 1	1:37207536-37600908
ENSCAFG00000026445	SNORD46	Small nucleolar RNA SNORD46	15:15541326-15545208		ENSCAFG00000000479	KCNC2	potassium voltage-gated channel Shaw-related subfamily member 2	10:15639615-15818078
ENSCAFG00000026495	-	_	6:28058471-28186051		ENSCAFG00000000497	IFGGD3	Uncharacterized protein	11:922751-957886
ENSCAFG00000026504	-	_	12:20452261-20511696		ENSCAFG00000000502	-	Interferon-gamma-inducible GTPase IFGGC1 protein; Uncharacterized protein	11:806712-861830
ENSCAFG00000026726	-	_	30:10439671-10560196		ENSCAFG00000000513	ATP6V1G1	Canis lupus familiaris ATPase H+ transporting lysosomal 13kDa V1 subunit G2 (ATP6V1G2) mRNA.	12:1046877-1048117
ENSCAFG00000026824	SNORD100	Small nucleolar RNA SNORD100	1:25836708-25839118		ENSCAFG00000000742	-	_	1:49104264-49105244
ENSCAFG00000027435	-	_	37:25777656-26007702		ENSCAFG00000000853	GPR31	G protein-coupled receptor 31	1:54976177-54977116
ENSCAFG00000027581	SNORA81	Small nucleolar RNA SNORA81	34:19354868-19374876		ENSCAFG00000000899	SULT4A1	Uncharacterized protein	10:21781434-21815098
ENSCAFG00000027613	SNORA21	Small nucleolar RNA SNORA21	9:23397251-23403052		ENSCAFG00000000904	MPPED1	metallophosphoesterase domain containing 1	10:22075339-22156172
ENSCAFG00000027886	SNORD10	Small nucleolar RNA SNORD10	5:32473595-32594414		ENSCAFG00000000932	SLC35F1	solute carrier family 35 member F1	1:58253305-58401134
ENSCAFG00000028010	7SK	7SK RNA	19:38519926-38568223		ENSCAFG00000000995	42250	septin 3	10:23370193-23396205
ENSCAFG00000028034	snoU54	Small nucleolar RNA U54	29:7484295-7489691		ENSCAFG00000000996	FABP7	fatty acid binding protein 7 brain	1:62084556-62088231
ENSCAFG00000028099	SNORA20	Small nucleolar RNA SNORA20	1:49011741-49037858		ENSCAFG00000001105	KCNQ3	potassium voltage-gated channel KQT-like subfamily member 3	13:28773737-28822418
ENSCAFG00000028483	-	_	9:12301008-12307315		ENSCAFG00000001221	PACSIN1	protein kinase C and casein kinase substrate in neurons 1	12:3753593-3811775
ENSCAFG00000028772	-	Uncharacterized protein	9:22808600-22810903		ENSCAFG00000001269	BAI1	brain-specific angiogenesis inhibitor 1	13:36628004-36690347
ENSCAFG00000029214	NPB	neuropeptide B	9:308180-532515		ENSCAFG00000001314	CACNA1I	calcium channel voltage-dependent T type alpha 1I subunit	10:25377867-25494412
ENSCAFG00000029284	SAT1	spermidine/spermine N1-acetyltransferase 1	X:19461379-19465677		ENSCAFG00000001362	PLXNA4	plexin A4	14:4747557-5102995
ENSCAFG00000029968	SHH	Hedgehog protein	16:18650548-18663321		ENSCAFG00000001367	NPTXR	neuronal pentraxin receptor	10:25967365-26011562
ENSCAFG00000030420	HOTAIRM1_2	HOX antisense intergenic RNA myeloid 1 conserved region 2	14:40272638-40272852		ENSCAFG00000001407	KCNJ4	potassium inwardly-rectifying channel subfamily J member 4	10:26347139-26348486
ENSCAFG00000030445	-	_	6:38295308-38309982		ENSCAFG00000001423	CPNE5	copine V	12:5812081-5902743
ENSCAFG00000030513	-	_	32:158137-206910		ENSCAFG00000001567	SH3GL2	SH3-domain GRB2-like 2	11:37720792-37770263
ENSCAFG00000031938	GEM	GTP binding protein overexpressed in skeletal muscle	29:39024466-39036781		ENSCAFG00000001689	-	Uncharacterized protein	10:28132179-28138366
ENSCAFG00000032234	-	Uncharacterized protein	20:55576876-55585906		ENSCAFG00000001738	GRM8	glutamate receptor metabotropic 8	14:8993462-9719899
ENSCAFG00000032679	-	Uncharacterized protein	2:75688433-75851286		ENSCAFG00000001790	GRM3	glutamate receptor metabotropic 3	14:12980179-13071783
ENSCAFG00000032718	-	_	36:20973941-20979872		ENSCAFG00000001815	GDA	guanine deaminase	1:85510565-85586415
ENSCAFG00000000120	IL23A	interleukin 23 alpha subunit p19	10:638718-640359		ENSCAFG00000001962	KIAA1045	KIAA1045	11:51516536-51576497
ENSCAFG00000002101	-	_	12:16125854-16126751		ENSCAFG00000002143	DYNC1I1	dynein cytoplasmic 1 intermediate chain 1	14:20967433-21279083
ENSCAFG00000005721	-	Uncharacterized protein	15:44647440-44648410		ENSCAFG00000002172	DIRAS2	DIRAS family GTP-binding RAS-like 2	1:96078206-96078806
ENSCAFG00000006327	-	Uncharacterized protein	20:17617484-17618472		ENSCAFG00000002207	TAC1	tachykinin precursor 1	14:22632646-22640274
ENSCAFG00000007356	BPIFB4	BPI fold containing family B member 4	24:22344845-22369972		ENSCAFG00000002402	DGKB	diacylglycerol kinase beta 90kDa	14:28914861-29609161
ENSCAFG00000008096	-	_	3:15755110-15755587		ENSCAFG00000002487	GABBR2	Uncharacterized protein	11:55467144-55818001
ENSCAFG00000008234	DLA-79	Canis lupus familiaris MHC class Ib (DLA-79) mRNA.	18:41142495-41146106		ENSCAFG00000002617	GRIN3A	glutamate receptor ionotropic N-methyl-D-aspartate 3A	11:58271747-58421761
ENSCAFG00000008828	-	_	26:9712808-9713491		ENSCAFG00000002657	TTYH1	tweety family member 1	1:102860627-102875962
ENSCAFG00000010027	HAO2	hydroxyacid oxidase 2 (long chain)	17:56505359-56528739		ENSCAFG00000002709	FILIP1	filamin A interacting protein 1	12:36938577-37118739
ENSCAFG00000012539	ABHD11	abhydrolase domain containing 11	6:6550965-6556271		ENSCAFG00000002713	-	Protein kinase C	1:103295108-103312026
ENSCAFG00000015488	-	Uncharacterized protein	34:37572309-37770055		ENSCAFG00000002714	EPHA5	EPH receptor A5	13:56054052-56401188
ENSCAFG00000016124	CLDN7	claudin 7	5:32189048-32365679		ENSCAFG00000002801	NPY	neuropeptide Y	14:37824560-37831424
ENSCAFG00000016445	-	Uncharacterized protein	7:40480306-40491133		ENSCAFG00000003122	NEUROD6	neuronal differentiation 6	14:43914148-43915162
ENSCAFG00000016447	CD5L	CD5 molecule-like	7:40515317-40526634		ENSCAFG00000003363	CHRM2	cholinergic receptor muscarinic 2	16:11517645-11519046
ENSCAFG00000017519	TNMD	tenomodulin	X:74459193-74475057		ENSCAFG00000003407	ADD2	adducin 2 (beta)	10:69058266-69098786
ENSCAFG00000017544	S100A14	S100 calcium binding protein A14	7:43326708-43501012		ENSCAFG00000003526	BRINP1	bone morphogenetic protein/retinoic acid inducible neural-specific 1	11:72628581-72764077
ENSCAFG00000017552	S100A5	S100 calcium binding protein A5	7:43326708-43501012		ENSCAFG00000003548	NCDN	neurochondrin	15:6573886-6582726
ENSCAFG00000019451	TKTL1	transketolase-like 1	X:121987490-122034958		ENSCAFG00000003568	CPT1C	Uncharacterized protein	1:106824621-106845850
ENSCAFG00000019720	MADCAM1	Canis lupus familiaris mucosal vascular addressin cell adhesion molecule 1 (MADCAM1) mRNA.	20:57908366-58021323		ENSCAFG00000003616	FAM131B	family with sequence similarity 131 member B	16:6334856-6341376
ENSCAFG00000020220	HP	Haptoglobin Haptoglobin alpha chain Haptoglobin beta chain	5:77795315-77799904		ENSCAFG00000003638	-	Uncharacterized protein	18:11353903-11371983
ENSCAFG00000021156	SNORA2	Small nucleolar RNA SNORA2/SNORA34 family	37:7035101-7061783		ENSCAFG00000003651	-	_	15:7704651-8192009
ENSCAFG00000021884	7SK	7SK RNA	26:15719697-15884090		ENSCAFG00000003665	SLC17A7	solute carrier family 17 (vesicular glutamate transporter) member 7	1:107054145-107064065
ENSCAFG00000022406	SNORD14	Small nucleolar RNA SNORD14	5:11293059-11296611		ENSCAFG00000003717	FAM49A	Uncharacterized protein	17:12207920-12237810
ENSCAFG00000023751	-	Uncharacterized protein	25:50589479-50594086		ENSCAFG00000003745	EPHB6	EPH receptor B6	16:6706525-6715113
ENSCAFG00000024745	-	Uncharacterized protein	22:10211513-10213139		ENSCAFG00000003785	-	_	19:8712650-8731888
ENSCAFG00000024869	ADAMDEC1	ADAM-like decysin 1	25:33046263-33061498		ENSCAFG00000003854	WASF1	WAS protein family member 1	12:66834483-66852886
ENSCAFG00000024889	CD1B	Canis lupus familiaris CD1b molecule (CD1B) mRNA.	38:23316202-23319767		ENSCAFG00000004140	SLC8A2	solute carrier family 8 (sodium/calcium exchanger) member 2	1:108544508-108574120
ENSCAFG00000026033	SNORA3	Small nucleolar RNA SNORA3/SNORA45 family	21:32099791-32102754		ENSCAFG00000004165	NDNF	neuron-derived neurotrophic factor	19:19009404-19049937
ENSCAFG00000026756	-	_	30:34372367-34422155		ENSCAFG00000004299	GAD2	Canis lupus familiaris glutamate decarboxylase 2 (pancreatic islets and brain 65kDa) (GAD2) mRNA.	2:7365707-7450893
ENSCAFG00000026833	SNORD94	Small nucleolar RNA SNORD94	17:38970656-39000366		ENSCAFG00000004381	GRM5	glutamate receptor metabotropic 5	21:10982217-11492456
ENSCAFG00000028112	SNORA2	Small nucleolar RNA SNORA2/SNORA34 family	27:5826593-5845785		ENSCAFG00000004591	-	Uncharacterized protein	2:20300236-20301655
ENSCAFG00000028931	PPP1R3G	protein phosphatase 1 regulatory subunit 3G	35:5208999-5209173		ENSCAFG00000004753	ARPP21	cAMP-regulated phosphoprotein 21kDa	23:5722508-5877298
ENSCAFG00000028985	-	Uncharacterized protein	1:111083447-111083951		ENSCAFG00000004828	SLC30A3	solute carrier family 30 (zinc transporter) member 3	17:21230480-21239400
ENSCAFG00000029038	LY6K	lymphocyte antigen 6 complex locus K	JH373372.1:20-24937		ENSCAFG00000004889	SCTR	secretin receptor	19:30525508-30577075
ENSCAFG00000029317	-	Uncharacterized protein	5:10597173-10598106		ENSCAFG00000004956	PAK1	p21 protein (Cdc42/Rac)-activated kinase 1	21:21326830-21408280
ENSCAFG00000030195	-	Uncharacterized protein	21:50472425-50477975		ENSCAFG00000004970	DPP10	dipeptidyl-peptidase 10 (non-functional)	19:33430696-33883552
ENSCAFG00000030346	-	Uncharacterized protein	6:11970468-11971194		ENSCAFG00000004994	-	Uncharacterized protein	20:6366810-6568547
ENSCAFG00000030347	C3orf52	chromosome 3 open reading frame 52	33:16715073-16740108		ENSCAFG00000005033	SLC6A1	solute carrier family 6 (neurotransmitter transporter) member 1	20:7341028-7383284
ENSCAFG00000030507	-	Histone H2A	35:24544082-24544475		ENSCAFG00000005076	ATP2B2	ATPase Ca++ transporting plasma membrane 2	20:7863327-8034474
ENSCAFG00000030707	UBE2U	ubiquitin-conjugating enzyme E2U (putative)	5:45964805-45997461		ENSCAFG00000005130	NAPB	N-ethylmaleimide-sensitive factor attachment protein beta	24:216935-258349
ENSCAFG00000031246	UGT1A6	Canis lupus familiaris UDP glucuronosyltransferase 1 family polypeptide A6 (UGT1A6) mRNA.	25:45115836-45161632		ENSCAFG00000005165	MGAT5B	mannosyl (alpha-1 6-)-glycoprotein beta-1 6-N-acetyl-glucosaminyltransferase isozyme B	9:3882451-3953059
ENSCAFG00000031313	-	Uncharacterized protein	14:44980558-44981365		ENSCAFG00000005461	NDRG2	NDRG family member 2	15:18104584-18115015
ENSCAFG00000031403	-	Uncharacterized protein	26:25672169-25672852		ENSCAFG00000005583	GRM7	glutamate receptor metabotropic 7	20:10230536-11058646
ENSCAFG00000003029	IL8	Canis lupus familiaris interleukin 8 (IL8) mRNA.	13:62434791-62438932		ENSCAFG00000005603	ISM1	isthmin 1 angiogenesis inhibitor	24:9324941-9396020
ENSCAFG00000004868	CRSP-3	Canis lupus familiaris calcitonin receptor-stimulating peptide 3 (CRSP-3) mRNA.	21:37676840-37680643		ENSCAFG00000005610	KIF5C	kinesin family member 5C	19:50535363-50684487
ENSCAFG00000005081	INSIG1	insulin induced gene 1	16:18260389-18272232		ENSCAFG00000005662	SNAP25	synaptosomal-associated protein 25kDa	24:12004232-12028750
ENSCAFG00000005766	SYT1	synaptotagmin I	15:21834766-22043278		ENSCAFG00000005689	NPTX1	neuronal pentraxin I	9:1388532-1398172
ENSCAFG00000005853	PPP1R27	protein phosphatase 1 regulatory subunit 27	9:308180-532515		ENSCAFG00000005690	LAMP5	lysosomal-associated membrane protein family member 5	24:12679191-12693729
ENSCAFG00000006607	DPYSL3	dihydropyrimidinase-like 3	2:41687674-41750519		ENSCAFG00000005721	-	Uncharacterized protein	15:44647440-44648410
ENSCAFG00000008369	-	Uncharacterized protein	25:29751375-29781041		ENSCAFG00000005766	SYT1	synaptotagmin I	15:21834766-22043278
ENSCAFG00000008440	FGG	Fibrinogen gamma chain	15:52261219-52270169		ENSCAFG00000005767	PDE6G	Canis lupus familiaris phosphodiesterase 6G cGMP-specific rod gamma (PDE6G) mRNA.	9:308180-532515
ENSCAFG00000008546	CRSP1	Canis lupus familiaris calcitonin-related polypeptide beta (CALCB) mRNA.	21:37658339-37661354		ENSCAFG00000005856	PLCB1	phospholipase C beta 1 (phosphoinositide-specific)	24:13337233-13587167
ENSCAFG00000008550	CRSP-2	Canis lupus familiaris calcitonin receptor-stimulating peptide-2 (CRSP-2) mRNA.	21:37807936-37811724		ENSCAFG00000006128	SEMA3D	sema domain immunoglobulin domain (Ig) short basic domain secreted (semaphorin) 3D	18:24258133-24429758
ENSCAFG00000008936	SPOCK3	sparc/osteonectin cwcv and kazal-like domains proteoglycan (testican) 3	15:62395706-62661308		ENSCAFG00000006231	DCLK1	doublecortin-like kinase 1	25:4441888-4778031
ENSCAFG00000008989	-	_	32:6757905-6758228		ENSCAFG00000006542	PPP2R2B	protein phosphatase 2 regulatory subunit B beta	2:41004433-41447148
ENSCAFG00000009933	NELL1	NEL-like 1 (chicken)	21:42659695-43468362		ENSCAFG00000006596	ANKS1B	ankyrin repeat and sterile alpha motif domain containing 1B	15:38129188-39186359
ENSCAFG00000010848	GAP43	growth associated protein 43	33:19668236-19770569		ENSCAFG00000006748	PDYN	prodynorphin	24:19053869-19057678
ENSCAFG00000013622	-	Uncharacterized protein	26:27164803-27165446		ENSCAFG00000006881	SLC1A2	Canis lupus familiaris solute carrier family 1 (glial high affinity glutamate transporter) member 2 (SLC1A2) mRNA.	18:32565257-32708669
ENSCAFG00000014240	PPP1R1C	protein phosphatase 1 regulatory (inhibitor) subunit 1C	36:25125238-25241779		ENSCAFG00000007129	SCN1B	Canis lupus familiaris sodium channel voltage-gated type I beta (SCN1B) mRNA.	1:117503632-117511719
ENSCAFG00000015054	MMP1	matrix metallopeptidase 1 (interstitial collagenase)	5:28978382-28986863		ENSCAFG00000007196	KIAA1549L	KIAA1549-like	18:34029429-34286482
ENSCAFG00000015557	-	Uncharacterized protein	17:37499224-37499530		ENSCAFG00000007276	HTR1A	Canis lupus familiaris 5-hydroxytryptamine (serotonin) receptor 1A (HTR1A) mRNA.	2:50005276-50006548
ENSCAFG00000020799	SNORA33	Small nucleolar RNA SNORA33	4:66347240-66437842		ENSCAFG00000007956	ROBO2	roundabout axon guidance receptor homolog 2 (Drosophila)	31:9414709-9590959
ENSCAFG00000020852	SNORA33	Small nucleolar RNA SNORA33	1:25836708-25839118		ENSCAFG00000008234	DLA-79	Canis lupus familiaris MHC class Ib (DLA-79) mRNA.	18:41142495-41146106
ENSCAFG00000021647	SNORD15	Small nucleolar RNA SNORD15	21:23181390-23187111		ENSCAFG00000008289	ENC1	Uncharacterized protein	2:57182479-57184249
ENSCAFG00000021808	SNORA4	Small nucleolar RNA SNORA4	34:19354868-19374876		ENSCAFG00000008302	MEF2C	myocyte enhancer factor 2C	3:19778970-19948202
ENSCAFG00000023160	-	Uncharacterized protein	26:26570288-26615302		ENSCAFG00000008440	FGG	Fibrinogen gamma chain	15:52261219-52270169
ENSCAFG00000024942	-	Uncharacterized protein	9:5869804-5876169		ENSCAFG00000008483	NDRG4	NDRG family member 4	2:58143244-58166413
ENSCAFG00000025443	-	Uncharacterized protein	18:11408335-11425209		ENSCAFG00000008499	CHRNA2	cholinergic receptor nicotinic alpha 2 (neuronal)	25:30125166-30135599
ENSCAFG00000025953	SNORA67	Small nucleolar RNA SNORA67	5:32473595-32594414		ENSCAFG00000008584	CXCL10	Canis lupus familiaris chemokine (C-X-C motif) ligand 10 (CXCL10) mRNA.	32:597633-600003
ENSCAFG00000026021	7SK	7SK RNA	9:59693133-59842412		ENSCAFG00000008617	GLRB	Uncharacterized protein	15:54429793-54521665
ENSCAFG00000026275	SNORD14	Small nucleolar RNA SNORD14	5:11293059-11296611		ENSCAFG00000008670	PTK2B	Uncharacterized protein	25:30137433-30264302
ENSCAFG00000026322	SNORA68	Small nucleolar RNA SNORA68	20:45036601-45039914		ENSCAFG00000008674	RASGRP1	RAS guanyl releasing protein 1 (calcium and DAG-regulated)	30:5802733-5903830
ENSCAFG00000027216	-	_	32:25469621-25492299		ENSCAFG00000008686	CSMD1	CUB and Sushi multiple domains 1	16:55140739-55827671
ENSCAFG00000027665	SCARNA20	Small Cajal body specific RNA 20	6:6583468-6595281		ENSCAFG00000008715	STMN4	stathmin-like 4	25:30344970-30352738
ENSCAFG00000028972	-	Uncharacterized protein	26:31311468-31317318		ENSCAFG00000008743	GHRH	growth hormone releasing hormone	24:25893346-25897400
ENSCAFG00000030258	-	Uncharacterized protein	8:72906320-73387840		ENSCAFG00000008744	RASGRF2	Ras protein-specific guanine nucleotide-releasing factor 2	3:25985314-26286819
ENSCAFG00000030680	-	Uncharacterized protein	AAEX03023381.1:6017-7265		ENSCAFG00000008757	DDN	dendrin	27:5573697-5576224
ENSCAFG00000030894	-	Uncharacterized protein	8:73837569-73968200		ENSCAFG00000008916	RPH3A	Uncharacterized protein	26:10280849-10379777
ENSCAFG00000031121	-	Uncharacterized protein	AAEX03023924.1:6282-7012		ENSCAFG00000008945	SLIT1	slit homolog 1 (Drosophila)	28:10349669-10519332
ENSCAFG00000031742	-	Uncharacterized protein	18:11548638-11567463		ENSCAFG00000009014	-	Uncharacterized protein	25:32463496-32469184
ENSCAFG00000031753	-	Uncharacterized protein	17:37702386-37829005		ENSCAFG00000009017	PPP1R16B	Uncharacterized protein	24:27231915-27299958
ENSCAFG00000031853	-	Uncharacterized protein	17:37624419-37625691		ENSCAFG00000009026	NECAB1	N-terminal EF-hand calcium binding protein 1	29:36154575-36332791
ENSCAFG00000032232	-	Uncharacterized protein	26:26652342-26653037		ENSCAFG00000009280	PTPRT	protein tyrosine phosphatase receptor type T	24:30000992-30764482
ENSCAFG00000032236	-	_	1:118670745-118774854		ENSCAFG00000009337	TUBB2B	tubulin beta 2B class IIb	35:3448031-3498483
ENSCAFG00000032328	-	Uncharacterized protein	26:27265387-27266208		ENSCAFG00000009391	PTPN5	protein tyrosine phosphatase non-receptor type 5 (striatum-enriched)	21:41097551-41130996
ENSCAFG00000032629	-	_	9:12301008-12307315		ENSCAFG00000009461	PHYHIP	phytanoyl-CoA 2-hydroxylase interacting protein	25:35031136-35037163
ENSCAFG00000003039	-	Uncharacterized protein	11:66883021-66944841		ENSCAFG00000009491	NRN1	neuritin 1	35:6069379-6078965
ENSCAFG00000005295	-	_	X:88180313-88180667		ENSCAFG00000009562	ITPKA	inositol-trisphosphate 3-kinase A	30:8532283-8541273
ENSCAFG00000005594	PLEKHB1	pleckstrin homology domain containing family B (evectins) member 1	21:24592027-24608029		ENSCAFG00000009632	TYRO3	TYRO3 protein tyrosine kinase	30:8571474-8598722
ENSCAFG00000008899	-	_	11:12608856-12609388		ENSCAFG00000009663	SCD	stearoyl-CoA desaturase (delta-9-desaturase)	28:13112454-13129198
ENSCAFG00000012886	APOA2	apolipoprotein A-II	38:21263851-21265787		ENSCAFG00000009677	B3GAT1	galactosylgalactosylxylosylprotein 3-beta-glucuronosyltransferase 1	5:740978-747641
ENSCAFG00000013623	-	Uncharacterized protein	1:103815549-103816071		ENSCAFG00000009713	TSHB	Canis lupus familiaris thyroid stimulating hormone beta (TSHB) mRNA.	17:52539581-52685427
ENSCAFG00000015233	PROM1	prominin 1	3:64230064-64362347		ENSCAFG00000009809	-	Uncharacterized protein	35:12436649-12745754
ENSCAFG00000016898	-	_	8:2611055-2611431		ENSCAFG00000009907	NTM	neurotrimin	5:2722899-3066373
ENSCAFG00000017958	COL5A3	collagen type V alpha 3	20:51037377-51074394		ENSCAFG00000009931	SLC12A5	solute carrier family 12 (potassium/chloride transporter) member 5	24:33293368-33320567
ENSCAFG00000024322	RPS27L	ribosomal protein S27-like	26:22633827-22690134		ENSCAFG00000009984	TBR1	T-box brain 1	36:6989702-6997934
ENSCAFG00000025533	ITIH4	inter-alpha-trypsin inhibitor heavy chain family member 4	AAEX03020161.1:1468-25643		ENSCAFG00000010115	TMEFF2	transmembrane protein with EGF-like and two follistatin-like domains 2	37:2413999-2635499
ENSCAFG00000026559	-	_	9:50525127-50575890		ENSCAFG00000010137	MFSD4	major facilitator superfamily domain containing 4	38:2037449-2068729
ENSCAFG00000028565	-	Uncharacterized protein	13:4927642-5499285		ENSCAFG00000010242	SLC4A10	solute carrier family 4 sodium bicarbonate transporter member 10	36:7106844-7392314
ENSCAFG00000031668	-	Uncharacterized protein	31:39475423-39776804		ENSCAFG00000010262	-	Uncharacterized protein	34:3884153-3944135
ENSCAFG00000031795	-	Uncharacterized protein	17:37550399-37551440		ENSCAFG00000010298	ADORA1	Canis lupus familiaris adenosine A1 receptor (ADORA1) mRNA.	7:44818-73051
					ENSCAFG00000010378	TAGLN3	transgelin 3	33:16637933-16653192
					ENSCAFG00000010382	APBA2	amyloid beta (A4) precursor protein-binding family A member 2	3:38243101-38431511
					ENSCAFG00000010425	HPCA	hippocalcin	2:68465461-68473716
					ENSCAFG00000010431	CACNA2D2	calcium channel voltage-dependent alpha 2/delta subunit 2	20:38858993-38993273
					ENSCAFG00000010628	SORCS1	sortilin-related VPS10 domain containing receptor 1	28:18619016-18933066
					ENSCAFG00000010848	GAP43	growth associated protein 43	33:19668236-19770569
					ENSCAFG00000010885	TPPP	tubulin polymerization promoting protein	34:11633058-11645895
					ENSCAFG00000010910	FEZ1	fasciculation and elongation protein zeta 1 (zygin I)	5:9001667-9044370
					ENSCAFG00000010971	SATB2	SATB homeobox 2	37:8547921-8731180
					ENSCAFG00000011008	CAMKV	CaM kinase-like vesicle-associated	20:39417160-39427608
					ENSCAFG00000011130	SCN2A	sodium channel voltage-gated type II alpha subunit	36:10517617-10602685
					ENSCAFG00000011150	WBSCR17	Williams-Beuren syndrome chromosome region 17	6:2132918-2575850
					ENSCAFG00000011168	NRGN	neurogranin (protein kinase C substrate RC3)	5:9674793-9680457
					ENSCAFG00000011233	PRKAR1B	protein kinase cAMP-dependent regulatory type I beta	6:16135714-16249031
					ENSCAFG00000011265	PTPRC	protein tyrosine phosphatase receptor type C	7:4156686-4282147
					ENSCAFG00000011274	SV2B	synaptic vesicle glycoprotein 2B	3:48698432-48767956
					ENSCAFG00000011344	ADAP1	Uncharacterized protein	6:15921925-15973627
					ENSCAFG00000011538	SCN3B	sodium channel voltage-gated type III beta subunit	5:10784599-10804065
					ENSCAFG00000011572	KCNG1	potassium voltage-gated channel subfamily G member 1	24:37321144-37327534
					ENSCAFG00000011587	NGEF	neuronal guanine nucleotide exchange factor	25:44471740-44598535
					ENSCAFG00000011694	SEZ6L	seizure related 6 homolog (mouse)-like	26:19889394-20079319
					ENSCAFG00000011731	CADM3	cell adhesion molecule 3	38:22761165-22779165
					ENSCAFG00000011756	PLXNA2	plexin A2	7:6863460-7049250
					ENSCAFG00000011767	CPNE6	copine VI (neuronal)	8:4078224-4084812
					ENSCAFG00000011799	GPM6B	glycoprotein M6B	X:10216879-10260956
					ENSCAFG00000011832	GLRA2	glycine receptor alpha 2	X:10859697-11033373
					ENSCAFG00000011938	SPATC1L	spermatogenesis and centriole associated 1-like	31:39467337-39475053
					ENSCAFG00000012068	AGT	angiotensinogen (serpin peptidase inhibitor clade A member 8)	4:8680832-8694324
					ENSCAFG00000012128	LRP2	low density lipoprotein receptor-related protein 2	36:13915631-14070685
					ENSCAFG00000012174	ATP1A2	ATPase Na+/K+ transporting alpha 2 polypeptide	38:22059924-22080856
					ENSCAFG00000012205	INPP5F	inositol polyphosphate-5-phosphatase F	28:29877809-29944490
					ENSCAFG00000012243	NEFH	Canis lupus familiaris neurofilament heavy polypeptide (NEFH) mRNA.	26:22725627-22735128
					ENSCAFG00000012249	ADCY1	adenylate cyclase 1 (brain)	16:1071860-1167086
					ENSCAFG00000012258	PHACTR3	phosphatase and actin regulator 3	24:44249019-44460634
					ENSCAFG00000012281	KALRN	kalirin RhoGEF kinase	33:27160977-27746497
					ENSCAFG00000012462	FABP2	fatty acid binding protein 2 intestinal	32:38244027-38248066
					ENSCAFG00000012560	GAD1	glutamate decarboxylase 1	36:15351288-15392990
					ENSCAFG00000012598	SLAMF7	SLAM family member 7	38:21577452-21596349
					ENSCAFG00000012623	STX1A	syntaxin 1A (brain)	6:6574690-6581692
					ENSCAFG00000012657	IFGGB1	Interferon-gamma-inducible GTPase IFGGB1 protein	11:571607-572930
					ENSCAFG00000012714	GPR26	G protein-coupled receptor 26	28:33151890-33174198
					ENSCAFG00000012785	NKAIN4	Na+/K+ transporting ATPase interacting 4	24:46668622-47275963
					ENSCAFG00000012789	PTPRO	protein tyrosine phosphatase receptor type O	27:31082288-31321894
					ENSCAFG00000012802	CD3E	T-cell surface glycoprotein CD3 epsilon chain	5:15403641-15415551
					ENSCAFG00000012824	SCN4B	sodium channel voltage-gated type IV beta subunit	5:15543631-15560444
					ENSCAFG00000012998	-	Uncharacterized protein	9:11497181-11516058
					ENSCAFG00000013039	ZNF365	zinc finger protein 365	4:14297606-14334301
					ENSCAFG00000013148	GRIN2B	Canis lupus familiaris glutamate receptor ionotropic N-methyl D-aspartate 2B (GRIN2B) mRNA.	27:32471152-32877656
					ENSCAFG00000013167	AKAP6	A kinase (PRKA) anchor protein 6	8:11403635-11874406
					ENSCAFG00000013188	CXXC11	CXXC finger protein 11	25:51624912-51628676
					ENSCAFG00000013228	CNKSR2	connector enhancer of kinase suppressor of Ras 2	X:17186805-17467711
					ENSCAFG00000013547	FZD5	Uncharacterized protein	37:16123797-16125567
					ENSCAFG00000013549	YWHAG	Uncharacterized protein	6:7507607-7532409
					ENSCAFG00000013622	-	Uncharacterized protein	26:27164803-27165446
					ENSCAFG00000013755	SSTR1	Canis lupus familiaris somatostatin receptor 1 (SSTR1) mRNA.	8:16572109-16573285
					ENSCAFG00000013891	SST	Canis lupus familiaris somatostatin (SST) mRNA.	34:20062887-20064942
					ENSCAFG00000013973	GFAP	glial fibrillary acidic protein	9:18569003-18579645
					ENSCAFG00000013983	COL13A1	collagen type XIII alpha 1	4:20838673-20985200
					ENSCAFG00000014053	RASGRF1	Ras protein-specific guanine nucleotide-releasing factor 1	3:57995030-58085403
					ENSCAFG00000014102	ADAM11	ADAM metallopeptidase domain 11	9:18709052-18728634
					ENSCAFG00000014146	ZNF385B	zinc finger protein 385B	36:22917585-23204052
					ENSCAFG00000014187	IQCJ	IQ motif containing J	34:25330865-25687740
					ENSCAFG00000014213	POU2AF1	POU class 2 associating factor 1	5:21671557-21695759
					ENSCAFG00000014218	NCAN	neurocan	20:43944250-43970876
					ENSCAFG00000014245	PDE1A	Canis lupus familiaris phosphodiesterase 1A calmodulin-dependent (PDE1A) mRNA.	36:25250061-25579811
					ENSCAFG00000014257	PPP2R2C	protein phosphatase 2 regulatory subunit B gamma	3:58477558-58611898
					ENSCAFG00000014315	ITGAD	Canis lupus familiaris integrin alpha D (ITGAD) mRNA.	6:16808970-16833975
					ENSCAFG00000014338	NRXN2	neurexin 2	18:52439603-52537623
					ENSCAFG00000014478	TRBC2	T cell receptor beta constant 2	16:6765175-6925374
					ENSCAFG00000014490	IGFBP2	insulin-like growth factor binding protein 2 36kDa	37:23545855-23569367
					ENSCAFG00000014530	ABLIM2	actin binding LIM protein family member 2	3:59840722-59980964
					ENSCAFG00000014533	42252	septin 5	26:29569753-29574051
					ENSCAFG00000014639	C1QC	complement component 1 q subcomponent C chain	2:76659986-76664962
					ENSCAFG00000014854	CNTNAP1	contactin associated protein 1	9:20294273-20307566
					ENSCAFG00000014945	RAB3A	RAB3A member RAS oncogene family	20:44798072-44801556
					ENSCAFG00000014980	FMO4	flavin containing monooxygenase 4	7:27568035-27593912
					ENSCAFG00000015146	SYN1	synapsin I	X:41181637-41241624
					ENSCAFG00000015176	-	Uncharacterized protein	26:27354221-27354548
					ENSCAFG00000015255	SLC35F4	solute carrier family 35 member F4	8:33057663-33087602
					ENSCAFG00000015428	PRMT8	protein arginine methyltransferase 8	27:41245285-41338042
					ENSCAFG00000015557	-	Uncharacterized protein	17:37499224-37499530
					ENSCAFG00000015595	IGSF21	immunoglobin superfamily member 21	2:80115121-80355470
					ENSCAFG00000015664	DRD5	dopamine receptor D5	3:69621733-69623158
					ENSCAFG00000015859	JAKMIP1	janus kinase and microtubule interacting protein 1	3:71204271-71280761
					ENSCAFG00000015954	GRID1	glutamate receptor ionotropic delta 1	4:33514875-33764765
					ENSCAFG00000016269	KIAA1239	KIAA1239	3:74662401-74835102
					ENSCAFG00000016407	NEUROD2	neuronal differentiation 2	9:22866211-22867360
					ENSCAFG00000016413	GNAI1	guanine nucleotide binding protein (G protein) alpha inhibiting activity polypeptide 1	18:19924449-19953220
					ENSCAFG00000016530	PLXDC1	plexin domain containing 1	9:23210791-23272306
					ENSCAFG00000016646	SNCB	synuclein beta	4:36711207-36718836
					ENSCAFG00000016850	GDPD2	glycerophosphodiester phosphodiesterase domain containing 2	X:54867497-54874910
					ENSCAFG00000016874	DLG3	discs large homolog 3 (Drosophila)	X:54886632-54939406
					ENSCAFG00000017110	CORO1A	Coronin	6:18161831-18167798
					ENSCAFG00000017251	GABRB2	gamma-aminobutyric acid (GABA) A receptor beta 2	4:49341457-49578074
					ENSCAFG00000017455	GAS7	growth arrest-specific 7	5:34339370-34457318
					ENSCAFG00000017498	CORO2B	coronin actin binding protein 2B	30:32635740-32702763
					ENSCAFG00000017616	LARP6	La ribonucleoprotein domain family member 6	30:34520827-34535614
					ENSCAFG00000017622	PRKCB	protein kinase C beta	6:21749698-22064315
					ENSCAFG00000017786	FHOD3	formin homology 2 domain containing 3	7:53479042-53654317
					ENSCAFG00000017811	PLP1	proteolipid protein 1	X:77188022-77207957
					ENSCAFG00000017838	CYP46A1	cytochrome P450 family 46 subfamily A polypeptide 1	8:68072602-68097030
					ENSCAFG00000017883	NRK	Nik related kinase	X:79410008-79488032
					ENSCAFG00000018020	COL4A5	Canis lupus familiaris collagen type IV alpha 5 (COL4A5) mRNA.	X:81982069-82250078
					ENSCAFG00000018057	LINGO1	leucine rich repeat and Ig domain containing 1	30:38735334-38737197
					ENSCAFG00000018091	SYNPO	synaptopodin	4:58496722-58532151
					ENSCAFG00000018125	AQP4	aquaporin 4	7:61855550-61875546
					ENSCAFG00000018146	ALDH3A1	Canis lupus familiaris aldehyde dehydrogenase 3 family member A1 (ALDH3A1) mRNA.	5:40465536-40474276
					ENSCAFG00000018163	CAMK2A	calcium/calmodulin-dependent protein kinase II alpha	4:58800920-58865889
					ENSCAFG00000018171	CCL5	Canis lupus familiaris chemokine (C-C motif) ligand 5 (CCL5) mRNA.	9:37817390-37823880
					ENSCAFG00000018198	RNF112	ring finger protein 112	5:40792039-40805161
					ENSCAFG00000018203	SLC6A7	solute carrier family 6 (neurotransmitter transporter) member 7	4:58874139-58892213
					ENSCAFG00000018379	GZMK	granzyme K (granzyme 3; tryptase II)	4:60559231-60569183
					ENSCAFG00000018508	HCN1	hyperpolarization activated cyclic nucleotide-gated potassium channel 1	4:64776432-65163127
					ENSCAFG00000018522	RAB11FIP4	RAB11 family interacting protein 4 (class II)	9:41342254-41416683
					ENSCAFG00000018531	DLGAP1	discs large (Drosophila) homolog-associated protein 1	7:70078036-70406177
					ENSCAFG00000018564	GRIA3	glutamate receptor ionotropic AMPA 3	X:94731022-95006306
					ENSCAFG00000018607	DNAJC6	DnaJ (Hsp40) homolog subfamily C member 6	5:44884357-45011882
					ENSCAFG00000018634	TUBB4A	tubulin beta 4A class IVa	20:53697771-53702348
					ENSCAFG00000018704	GLAST	Canis lupus familiaris solute carrier family 1 (glial high affinity glutamate transporter) member 3 (SLC1A3) mRNA.	4:71935575-72077309
					ENSCAFG00000018719	ALDOC	aldolase C fructose-bisphosphate	9:42778080-42782604
					ENSCAFG00000018744	C16orf45	chromosome 16 open reading frame 45	6:28242119-28356041
					ENSCAFG00000018854	SEZ6	seizure related 6 homolog (mouse)	9:43121032-43166314
					ENSCAFG00000019082	RBFOX1	RNA binding protein fox-1 homolog (C. elegans) 1	6:34220932-34555876
					ENSCAFG00000019161	GABRA3	Uncharacterized protein	X:120154052-120460598
					ENSCAFG00000019241	DUSP9	dual specificity phosphatase 9	X:121468733-121472606
					ENSCAFG00000019263	CELF5	CUGBP Elav-like family member 5	20:56030479-56075477
					ENSCAFG00000019290	PDZD4	PDZ domain containing 4	X:121616068-121647683
					ENSCAFG00000019374	GABRD	gamma-aminobutyric acid (GABA) A receptor delta	5:56984751-57000464
					ENSCAFG00000019451	TKTL1	transketolase-like 1	X:121987490-122034958
					ENSCAFG00000019623	FBXL16	F-box and leucine-rich repeat protein 16	6:39880400-39885850
					ENSCAFG00000019650	CAMTA1	calmodulin binding transcription activator 1	5:60864788-61429414
					ENSCAFG00000019791	SLC6A17	solute carrier family 6 (neutral amino acid transporter) member 17	6:41773312-41822976
					ENSCAFG00000019807	-	Uncharacterized protein	5:63682082-63690798
					ENSCAFG00000019906	JPH3	Uncharacterized protein	5:65451178-65530336
					ENSCAFG00000019953	NCS1	neuronal calcium sensor 1	9:53672016-53676808
					ENSCAFG00000020056	-	Uncharacterized protein	6:50553727-50594385
					ENSCAFG00000020380	AK5	adenylate kinase 5	6:69284287-69521023
					ENSCAFG00000021359	5S_rRNA	5S ribosomal RNA	1:114444568-114602268
					ENSCAFG00000022076	SNORD15	Small nucleolar RNA SNORD15	21:23181390-23187111
					ENSCAFG00000022989	7SK	7SK RNA	9:17357211-17357517
					ENSCAFG00000023160	-	Uncharacterized protein	26:26570288-26615302
					ENSCAFG00000023369	-	Uncharacterized protein	17:37534370-37534898
					ENSCAFG00000023386	CTXN1	Canis lupus familiaris cortexin 1 (CTXN1) mRNA.	20:52613313-52614159
					ENSCAFG00000023570	HAPLN4	hyaluronan and proteoglycan link protein 4	20:43934754-43940577
					ENSCAFG00000023585	-	Uncharacterized protein	2:65339264-65354762
					ENSCAFG00000023788	-	Beta-galactosidase	5:875452-931452
					ENSCAFG00000023920	-	Uncharacterized protein	26:26978141-26978655
					ENSCAFG00000024111	-	Uncharacterized protein	8:74067839-74068127
					ENSCAFG00000024322	RPS27L	ribosomal protein S27-like	26:22633827-22690134
					ENSCAFG00000024450	TPBGL	trophoblast glycoprotein-like	21:23314356-23315037
					ENSCAFG00000024889	CD1B	Canis lupus familiaris CD1b molecule (CD1B) mRNA.	38:23316202-23319767
					ENSCAFG00000025287	GZMB	granzyme B (granzyme 2 cytotoxic T-lymphocyte-associated serine esterase 1)	8:4508716-4511843
					ENSCAFG00000025345	RELN	reelin	18:16275576-16774085
					ENSCAFG00000025392	C8orf46	chromosome 8 open reading frame 46	29:16078660-16099604
					ENSCAFG00000025443	-	Uncharacterized protein	18:11408335-11425209
					ENSCAFG00000026021	7SK	7SK RNA	9:59693133-59842412
					ENSCAFG00000026033	SNORA3	Small nucleolar RNA SNORA3/SNORA45 family	21:32099791-32102754
					ENSCAFG00000026131	SNORA49	Small nucleolar RNA SNORA49	26:850332-939909
					ENSCAFG00000026604	SNORA11	Small nucleolar RNA SNORA11	X:44675131-44682895
					ENSCAFG00000028099	SNORA20	Small nucleolar RNA SNORA20	1:49011741-49037858
					ENSCAFG00000028509	-	Uncharacterized protein	8:73477705-73639802
					ENSCAFG00000028568	IGJ	immunoglobulin J polypeptide linker protein for immunoglobulin alpha and mu polypeptides	13:59961183-59971665
					ENSCAFG00000028899	-	Histone H2B	35:25061554-25061935
					ENSCAFG00000028917	SNX10	sorting nexin 10	14:39567472-39645409
					ENSCAFG00000028929	-	Uncharacterized protein	16:1066885-1067863
					ENSCAFG00000028985	-	Uncharacterized protein	1:111083447-111083951
					ENSCAFG00000029052	RAB6B	RAB6B member RAS oncogene family	23:30714672-30749184
					ENSCAFG00000029151	CALM3	calmodulin 3 (phosphorylase kinase delta)	1:109284672-109294917
					ENSCAFG00000029265	THY1	Uncharacterized protein	5:14506205-14512158
					ENSCAFG00000029317	-	Uncharacterized protein	5:10597173-10598106
					ENSCAFG00000029322	SCN2B	sodium channel subunit beta-2	5:15520838-15534238
					ENSCAFG00000029396	BASP1	brain abundant membrane attached signal protein 1	4:86361607-86362306
					ENSCAFG00000029426	NETO2	neuropilin (NRP) and tolloid (TLL)-like 2	2:67788976-67837566
					ENSCAFG00000029435	-	Uncharacterized protein	26:26451440-26451731
					ENSCAFG00000029493	-	Uncharacterized protein	26:27620222-27620543
					ENSCAFG00000029607	STXBP6	syntaxin binding protein 6 (amisyn)	8:4638313-4805102
					ENSCAFG00000029624	-	Uncharacterized protein	JH373881.1:10160-10451
					ENSCAFG00000029625	ANKRD63	ankyrin repeat domain 63	30:7466083-7467229
					ENSCAFG00000029660	CHN1	chimerin 1	36:18758325-18835330
					ENSCAFG00000029809	CACNG2	calcium channel voltage-dependent gamma subunit 2	10:27750996-27866051
					ENSCAFG00000029812	EPHX4	epoxide hydrolase 4	6:56861016-56900074
					ENSCAFG00000029896	NKX6-2	NK6 homeobox 2	28:40055982-40988959
					ENSCAFG00000029939	-	Uncharacterized protein	26:25571076-25571668
					ENSCAFG00000029943	-	Uncharacterized protein	JH373666.1:24755-35248
					ENSCAFG00000029969	RGS4	regulator of G-protein signaling 4	38:19770255-19778927
					ENSCAFG00000029993	DDAH1	dimethylarginine dimethylaminohydrolase 1	6:62549151-62684302
					ENSCAFG00000029996	-	Uncharacterized protein	8:73685662-73751650
					ENSCAFG00000030111	NCALD	neurocalcin delta	13:3366699-3447595
					ENSCAFG00000030258	-	Uncharacterized protein	8:72906320-73387840
					ENSCAFG00000030271	UBE2QL1	ubiquitin-conjugating enzyme E2Q family-like 1	34:7236122-7277885
					ENSCAFG00000030284	-	Uncharacterized protein	8:73654961-73655629
					ENSCAFG00000030421	-	Uncharacterized protein	4:38491517-38550747
					ENSCAFG00000030445	-	_	6:38295308-38309982
					ENSCAFG00000030472	-	Uncharacterized protein	8:51297141-51608600
					ENSCAFG00000030602	-	Uncharacterized protein	26:25949217-25949861
					ENSCAFG00000030680	-	Uncharacterized protein	AAEX03023381.1:6017-7265
					ENSCAFG00000030712	HIST1H2AB	histone cluster 1 H2ab	35:23990846-23991239
					ENSCAFG00000030739	-	Uncharacterized protein	JH373943.1:15397-21362
					ENSCAFG00000030867	HPCAL4	hippocalcin like 4	15:3199009-3206032
					ENSCAFG00000030891	-	Uncharacterized protein	15:19144142-19175674
					ENSCAFG00000030895	CA10	carbonic anhydrase X	9:27382405-27862083
					ENSCAFG00000030900	-	Uncharacterized protein	8:74052038-74052248
					ENSCAFG00000030924	U6	U6 spliceosomal RNA	9:45797827-45827387
					ENSCAFG00000031015	YWHAH	tyrosine 3-monooxygenase/tryptophan 5-monooxygenase activation protein eta polypeptide	26:24784720-24795778
					ENSCAFG00000031121	-	Uncharacterized protein	AAEX03023924.1:6282-7012
					ENSCAFG00000031135	-	Uncharacterized protein	8:52206662-52386312
					ENSCAFG00000031241	LRRC55	leucine rich repeat containing 55	18:38921612-38931357
					ENSCAFG00000031403	-	Uncharacterized protein	26:25672169-25672852
					ENSCAFG00000031415	-	Uncharacterized protein	26:25050204-25050897
					ENSCAFG00000031457	-	Uncharacterized protein	37:25223670-25223988
					ENSCAFG00000031636	-	Histone H2B	35:24189349-24189727
					ENSCAFG00000031637	-	Uncharacterized protein	26:26019678-26020315
					ENSCAFG00000031742	-	Uncharacterized protein	18:11548638-11567463
					ENSCAFG00000031753	-	Uncharacterized protein	17:37702386-37829005
					ENSCAFG00000031786	-	Uncharacterized protein	26:27605066-27616302
					ENSCAFG00000031806	-	Uncharacterized protein	26:27626670-27632004
					ENSCAFG00000031949	PDXP	pyridoxal (pyridoxine vitamin B6) phosphatase	10:26944352-26952816
					ENSCAFG00000031953	OLIG1	oligodendrocyte transcription factor 1	31:27718885-27721393
					ENSCAFG00000031991	-	_	X:48942847-48943444
					ENSCAFG00000032057	-	Uncharacterized protein	26:27624213-27624534
					ENSCAFG00000032227	OLFM1	olfactomedin 1	9:50980054-50998116
					ENSCAFG00000032273	FXYD6	Canis lupus familiaris FXYD domain containing ion transport regulator 6 (FXYD6) mRNA.	5:15791982-15808500
					ENSCAFG00000032287	CCL22	chemokine (C-C motif) ligand 22	2:59039615-59045465
					ENSCAFG00000032335	-	Uncharacterized protein	JH373408.1:42102-51228
					ENSCAFG00000032358	-	Uncharacterized protein	8:72847360-72852219
					ENSCAFG00000032668	SPOCK1	sparc/osteonectin cwcv and kazal-like domains proteoglycan (testican) 1	11:24731935-25007431
					ENSCAFG00000032672	FGF13	fibroblast growth factor 13	X:108658046-108730074
					ENSCAFG00000032695	FGF10	fibroblast growth factor 10	4:65851122-65930994
					ENSCAFG00000032719	-	_	26:16926082-16926478
					ENSCAFG00000002063	SIT1	signaling threshold regulating transmembrane adaptor 1	11:52190214-52191167
					ENSCAFG00000003331	-	Uncharacterized protein	11:68412812-68598444
					ENSCAFG00000005186	MRPL33	mitochondrial ribosomal protein L33	18:53319765-53364663
					ENSCAFG00000005693	MZB1	marginal zone B and B1 cell-specific protein	2:34710727-34712599
					ENSCAFG00000005853	PPP1R27	protein phosphatase 1 regulatory subunit 27	9:308180-532515
					ENSCAFG00000009209	NR4A2	nuclear receptor subfamily 4 group A member 2	36:2546243-2554509
					ENSCAFG00000010351	TFF1	Canis lupus familiaris trefoil factor 1 (TFF1) mRNA.	31:36681312-36684660
					ENSCAFG00000010623	SORCS3	sortilin-related VPS10 domain containing receptor 3	28:16909795-17491098
					ENSCAFG00000012525	MUC13	mucin 13 cell surface associated	33:27925836-27957535
					ENSCAFG00000013748	-	Uncharacterized protein	27:36412030-36457308
					ENSCAFG00000014225	PAPPA2	pappalysin 2	7:22772331-23035014
					ENSCAFG00000015160	-	Uncharacterized protein	9:8958344-8969308
					ENSCAFG00000015333	NPTX2	neuronal pentraxin II	6:10805531-10817315
					ENSCAFG00000018023	GP2	Canis lupus familiaris glycoprotein 2 (zymogen granule membrane) (GP2) mRNA.	6:25009115-25027537
					ENSCAFG00000018139	MBD3L1	methyl-CpG binding domain protein 3-like 1	20:51876775-51877411
					ENSCAFG00000019593	-	Canis lupus familiaris mastin (LOC448801) mRNA.	6:39477692-39479811
					ENSCAFG00000019676	ERRFI1	ERBB receptor feedback inhibitor 1	5:61623510-61625977
					ENSCAFG00000024488	SUB1	SUB1 homolog (S. cerevisiae)	31:28728658-28730735
					ENSCAFG00000025004	CYP4A38	Canis lupus familiaris cytochrome P450 4A38 (CYP4A38) mRNA.	15:13638744-13657531
					ENSCAFG00000025978	SNORA64	Small nucleolar RNA SNORA64/SNORA10 family	6:38966853-38968703
					ENSCAFG00000026801	SNORD23	Small nucleolar RNA SNORD23	1:108303276-108315699
					ENSCAFG00000028299	SCARNA21	Small Cajal body specific RNA 21	5:32747618-32766955
					ENSCAFG00000028795	-	Uncharacterized protein	JH373477.1:552-3354
					ENSCAFG00000028972	-	Uncharacterized protein	26:31311468-31317318
					ENSCAFG00000029238	U6	U6 spliceosomal RNA	26:9319231-9356259
					ENSCAFG00000029865	-	Uncharacterized protein	JH373641.1:15271-15754
					ENSCAFG00000030286	-	Uncharacterized protein	21:28179118-28205138
					ENSCAFG00000030513	-	_	32:158137-206910
					ENSCAFG00000030890	-	Uncharacterized protein	JH373538.1:5383-6454
					ENSCAFG00000030894	-	Uncharacterized protein	8:73837569-73968200
					ENSCAFG00000032035	-	Uncharacterized protein	3:12638732-12659893
					ENSCAFG00000032236	-	_	1:118670745-118774854
					ENSCAFG00000000039	DOK6	docking protein 6	1:8453901-8816575
					ENSCAFG00000000382	-	_	1:40251878-40474194
					ENSCAFG00000000744	KCNV1	potassium channel subfamily V member 1	13:10439766-10450005
					ENSCAFG00000000906	42255	septin 8	11:21050175-21079544
					ENSCAFG00000001472	CKB	creatine kinase brain	5:25990857-25991925
					ENSCAFG00000001688	ELAVL2	ELAV like neuron-specific RNA binding protein 2	11:42503924-42647086
					ENSCAFG00000001740	LARGE	like-glycosyltransferase	10:29878085-30398019
					ENSCAFG00000001883	GABRA1	gamma-aminobutyric acid (GABA) A receptor alpha 1	4:49006945-49065726
					ENSCAFG00000002201	SHC3	SHC (Src homology 2 domain containing) transforming protein 3	1:97019996-97094805
					ENSCAFG00000002645	KCNQ5	potassium voltage-gated channel KQT-like subfamily member 5	12:35194915-35366335
					ENSCAFG00000002667	-	Uncharacterized protein	12:36496990-36498475
					ENSCAFG00000002951	SNAP91	Canis lupus familiaris synaptosomal-associated protein 91kDa homolog (mouse) (SNAP91) mRNA.	12:43919566-44063676
					ENSCAFG00000003456	VSTM2A	V-set and transmembrane domain containing 2A	18:5344268-5446078
					ENSCAFG00000003457	-	Uncharacterized protein	14:58897163-58915568
					ENSCAFG00000003483	KCNF1	potassium voltage-gated channel subfamily F member 1	17:7752650-7754153
					ENSCAFG00000003761	NR2E1	nuclear receptor subfamily 2 group E member 1	12:65208843-65230579
					ENSCAFG00000004544	DLG2	discs large homolog 2 (Drosophila)	21:15005601-15776729
					ENSCAFG00000004971	ACTR3B	ARP3 actin-related protein 3 homolog B (yeast)	16:16471053-16555897
					ENSCAFG00000005328	GALNT14	UDP-N-acetyl-alpha-D-galactosamine:polypeptide N-acetylgalactosaminyltransferase 14 (GalNAc-T14)	17:24535859-24741260
					ENSCAFG00000005415	ARRB1	arrestin beta 1	21:23260723-23296854
					ENSCAFG00000005846	GCGR	glucagon receptor	9:308180-532515
					ENSCAFG00000005963	METTL21C	methyltransferase like 21C	22:52181145-52190152
					ENSCAFG00000005976	NTS	Neurotensin/neuromedin N Large neuromedin N Neuromedin N Neurotensin NT-tail Tail peptide	15:27360958-27372233
					ENSCAFG00000006248	CHL1	cell adhesion molecule L1-like	20:16789571-16985082
					ENSCAFG00000007290	RGS7BP	regulator of G-protein signaling 7 binding protein	2:50430040-50527726
					ENSCAFG00000007356	BPIFB4	BPI fold containing family B member 4	24:22344845-22369972
					ENSCAFG00000007798	-	Uncharacterized protein	25:23039201-23062008
					ENSCAFG00000008653	GRIA2	glutamate receptor ionotropic AMPA 2	15:54634293-54708226
					ENSCAFG00000008760	WNT1	wingless-type MMTV integration site family member 1	27:5588151-5592060
					ENSCAFG00000008987	SLC32A1	Uncharacterized protein	24:27142422-27147011
					ENSCAFG00000009767	NHLH2	nescient helix loop helix 2	17:53360815-53361223
					ENSCAFG00000009952	KCHIP2	Kv channel-interacting protein 2	28:14409525-14425641
					ENSCAFG00000009977	CAP2	CAP adenylate cyclase-associated protein 2 (yeast)	35:16336257-16477144
					ENSCAFG00000010035	GABRA5	gamma-aminobutyric acid (GABA) A receptor alpha 5	3:33663412-33746139
					ENSCAFG00000010135	LUZP2	leucine zipper protein 2	21:45926944-46185568
					ENSCAFG00000010877	ABCA9	ATP-binding cassette sub-family A (ABC1) member 9	9:15517411-15648625
					ENSCAFG00000011185	SVOP	SV2 related protein homolog (rat)	26:17984643-18032449
					ENSCAFG00000011876	HSPA12A	heat shock 70kDa protein 12A	28:27235686-27266501
					ENSCAFG00000012942	SRMS	src-related kinase lacking C-terminal regulatory tyrosine and N-terminal myristylation sites	24:46668622-47275963
					ENSCAFG00000013414	ADAM23	ADAM metallopeptidase domain 23	37:14996851-15164336
					ENSCAFG00000013733	GATM	glycine amidinotransferase (L-arginine:glycine amidinotransferase)	30:11725359-11742792
					ENSCAFG00000013943	LRFN5	leucine rich repeat and fibronectin type III domain containing 5	8:19585119-19602548
					ENSCAFG00000014360	SPTSSB	serine palmitoyltransferase small subunit B	34:27322407-27322635
					ENSCAFG00000014460	ATL1	atlastin GTPase 1	8:26959650-27033374
					ENSCAFG00000014515	-	_	X:38639636-38640744
					ENSCAFG00000014523	ENO2	enolase 2 (gamma neuronal)	27:38116697-38127850
					ENSCAFG00000015679	RGS7	regulator of G-protein signaling 7	7:32296081-32665185
					ENSCAFG00000016325	CNIH3	cornichon family AMPA receptor auxiliary protein 3	7:39755784-39846298
					ENSCAFG00000016696	TMED11	Canis lupus familiaris glycoprotein 25L (TMED11) mRNA.	3:91435696-91453248
					ENSCAFG00000017460	MYH13	myosin heavy chain 13 skeletal muscle	5:34617978-34669349
					ENSCAFG00000017571	CACNG3	calcium channel voltage-dependent gamma subunit 3	6:21627546-21711271
					ENSCAFG00000017865	ISLR2	immunoglobulin superfamily containing leucine-rich repeat 2	30:37291847-37320739
					ENSCAFG00000018352	ASIC2	acid-sensing (proton-gated) ion channel 2	9:39817517-40084951
					ENSCAFG00000018572	-	Uncharacterized protein	4:66633571-66655058
					ENSCAFG00000018970	GRIN2A	Uncharacterized protein	6:32522644-32668848
					ENSCAFG00000019242	PNCK	pregnancy up-regulated non-ubiquitously expressed CaM kinase	X:121489008-121491388
					ENSCAFG00000020399	CA7	carbonic anhydrase VII	5:82446203-82455323
					ENSCAFG00000023412	SLC6A11	solute carrier family 6 (neurotransmitter transporter) member 11	20:7430995-7560230
					ENSCAFG00000023480	-	_	8:72906320-73387840
					ENSCAFG00000023944	-	Uncharacterized protein	8:72906320-73387840
					ENSCAFG00000024167	FJX1	four jointed box 1 (Drosophila)	18:32392256-32411869
					ENSCAFG00000024723	FOXG1	forkhead box G1	8:8278047-8278833
					ENSCAFG00000026495	-	_	6:28058471-28186051
					ENSCAFG00000028871	-	Uncharacterized protein	22:4453835-4454219
					ENSCAFG00000029309	-	Uncharacterized protein	28:40055982-40988959
					ENSCAFG00000029382	-	Histone H2B	35:25006509-25007808
					ENSCAFG00000029389	-	Uncharacterized protein	18:54335350-54338105
					ENSCAFG00000029431	SYNPR	synaptoporin	20:27572826-27871000
					ENSCAFG00000029595	POU3F2	POU class 3 homeobox 2	12:57104015-57105050
					ENSCAFG00000029757	MMD	monocyte to macrophage differentiation-associated	9:30424247-30453489
					ENSCAFG00000030195	-	Uncharacterized protein	21:50472425-50477975
					ENSCAFG00000030810	IDI1	isopentenyl-diphosphate delta isomerase 1	2:33927242-33930720
					ENSCAFG00000031023	-	Uncharacterized protein	8:2356961-2398745
					ENSCAFG00000031196	-	Uncharacterized protein	26:27303189-27304407
					ENSCAFG00000031700	-	Uncharacterized protein	X:122061569-122253562
					ENSCAFG00000032078	-	Uncharacterized protein	26:25975986-25976748
					ENSCAFG00000032234	-	Uncharacterized protein	20:55576876-55585906
					ENSCAFG00000032328	-	Uncharacterized protein	26:27265387-27266208
					ENSCAFG00000032706	-	Uncharacterized protein	26:27024436-27025237
